# Supplementary material for: New Insights into the Runt Domain of RUNX2 in Melanoma Cell Proliferation and Migration
Source: PubMed Central journal article supplement (PMC6262450; doi:10.3390/cells7110220), 2018-11-20
Supplement: cells-07-00220-s001.pdf [file cells-07-00220-s001.pdf]

# New Insights into the Runt Domain of RUNX2 in Melanoma Cell Proliferation and Migration

Michela Deiana <sup>1,2</sup>, Luca Dalle Carbonare <sup>2</sup>, Michela Serena <sup>1</sup>, Samuele Cheri <sup>1,2</sup>, Francesca Parolini <sup>1</sup>, Alberto Gandini. <sup>3</sup>, Giulia Marchetto <sup>2</sup>, Giulio Innamorati <sup>3</sup>, Marcello Manfredi <sup>4</sup>, Emilio Marengo <sup>4</sup>, Jessica Brandi <sup>5</sup>, Daniela Cecconi <sup>5</sup>, Antonio Mori <sup>1</sup>, Maria Mihaela Mina <sup>2</sup>, Franco Antoniazzi <sup>3</sup>, Monica Mottes <sup>1</sup>, Natascia Tiso <sup>6</sup>, Giovanni Malerba <sup>1</sup>, Donato Zipeto <sup>1</sup> and Maria Teresa Valenti <sup>2,\*</sup>

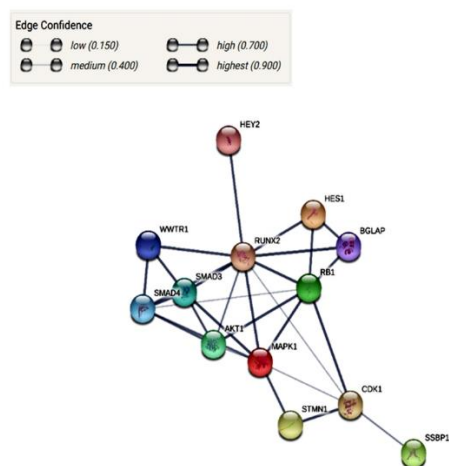

**Figure S1.** Protein-protein functional association based on confidence. Line thickness indicates the strength of data support. PPI enrichment p-value: 1.03e-07.

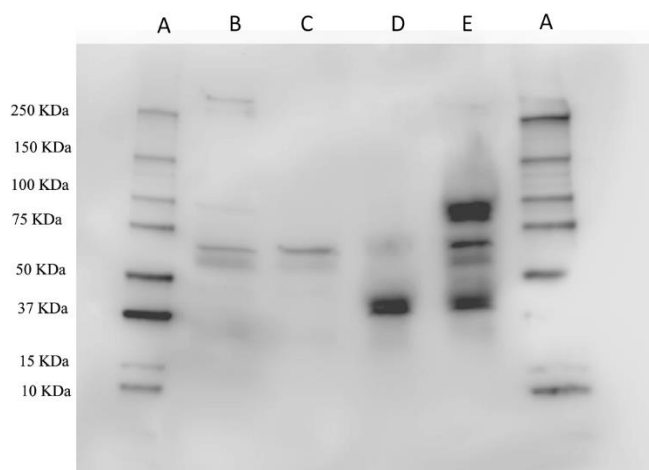

**Figure S2.** Representative image of a Western blot reaction against Runx2. Lanes A: MW; Lane B: MG63 osteosarcoma cell line; Lane C: WT: A375 cell line; Lane D: del-RUNT, clone with in-frame deletion of RUNT; Lane E: del-RUNT++: same clone, re-expressing wild-type RUNX2 after transduction with Lenti ORF viral vector (note around 75 kDa the RUNX2 mGFP-tagged).
